# Supplementary material for: CORROSION OF LOW-ALLOYED STEELS IN DEMINERALIZED WATER AT 25 C AND AT 360 C. EFFECT OF OXYGEN
Source: PLOS journal article supplement (doi:10.1371/journal.pone.0057783), 1964-12-01
Supplement: S5 (10.1371/journal.pone.0057783.s005) [file journal.pone.0057783.s005]

**Table S2.** Best-fit Dornhorst model parameters from fits to population and cohort survival data for each genotype, with 95% C.I.'s from the Monte Carlo technique in brackets.

| genotype                       | Platelet count, $N$ ( $\times 10^3 \mu\text{L}^{-1}$ ) | Production rate, $S$ ( $\times 10^3 \mu\text{L}^{-1}\text{hr}^{-1}$ ) | Natural life span, $T$ (hr) | random consumption rate constant, $r$ ( $\mu\text{L}^{-1}\text{hr}^{-1}$ ) | random loss rate, $R$ ( $\mu\text{L}^{-1}\text{day}^{-1}$ ) | random consumption fraction, $f$ | labelling efficiency, $e_1$ | labelling efficiency, $e_2$ | biotin half-life, $b_{1/2}$ (hr) |
|--------------------------------|--------------------------------------------------------|-----------------------------------------------------------------------|-----------------------------|----------------------------------------------------------------------------|-------------------------------------------------------------|----------------------------------|-----------------------------|-----------------------------|----------------------------------|
| <i>Bcl-x<sup>+/Pfr20</sup></i> | 847 $\pm$ 35                                           | 16.4<br>[15.5,18.2]                                                   | 55.0<br>[53.6,57.5]         | 0.0022<br>[0.0000,0.0073]                                                  | 45 [0,149]                                                  | 0.12<br>[0.00,0.34]              | 0.912<br>[0.900,0.928]      | 0.612<br>[0.576,0.644]      | 0.7 [0.0,2.0]                    |
| wild type                      | 1183 $\pm$ 70                                          | 16.2<br>[14.9,16.4]                                                   | 111.9<br>[102.3,112.4]      | 0.0082<br>[0.0053,0.0085]                                                  | 233<br>[149,242]                                            | 0.60<br>[0.42,0.61]              | 0.891<br>[0.880,0.896]      | 0.595<br>[0.575,0.621]      | 5.2 [3.7,6.1]                    |
| <i>Bak<sup>-/-</sup></i>       | 1798 $\pm$ 148                                         | 12.6<br>[11.9,13.3]                                                   | 202.3<br>[192.3,209.6]      | 0.0037<br>[0.0028,0.0045]                                                  | 159<br>[118,195]                                            | 0.53<br>[0.42,0.61]              | 0.830<br>[0.820,0.840]      | 0.569<br>[0.543,0.603]      | 5.7 [3.6,8.1]                    |
